# Supplementary material for: Interfacial modulation achieving a flexible anode of FeP/N-doped C@carbon cloth with a robust structure for high areal capacity lithium storage
Source: Royal Society of Chemistry journal article supplement (doi:10.1039/d1se01085a), 2021-01-01
Supplement: d1se01085a1.pdf [file d1se01085a1.pdf]

## Supporting Information

### **Interfacial modulation achieving flexible anode of FeP/N-doped C@carbon cloth with robust structure for high areal capacity lithium storage**

Weijuan Wang,<sup>a,1</sup> Hui Xu,<sup>b,1</sup> Genxi Yu,<sup>a</sup> Daming Chen,<sup>a</sup> Shangqi Sun,<sup>a</sup> Min Zhou,<sup>c,\*</sup> Jian Chen<sup>a,\*</sup>

*a. Jiangsu Key Laboratory of Advanced Metallic Materials, School of Materials Science and Engineering, Southeast University, Nanjing, 211189, China*

*b. Research School of Polymeric Materials, School of Materials Science and Engineering, Jiangsu University, Zhenjiang, Jiangsu, 212013, China*

*c. Hefei National Laboratory for Physical Sciences at the Microscale, School of Chemistry and Materials Science, University of Science and Technology of China, Hefei,*

*Anhui, 230026, PR China*

\* Corresponding author

E-mail: j.chen@seu.edu.cn (Jian Chen); min.zhou@tu-ilmenau.de (Min Zhou).

<sup>1</sup> These authors contributed equally to the paper.

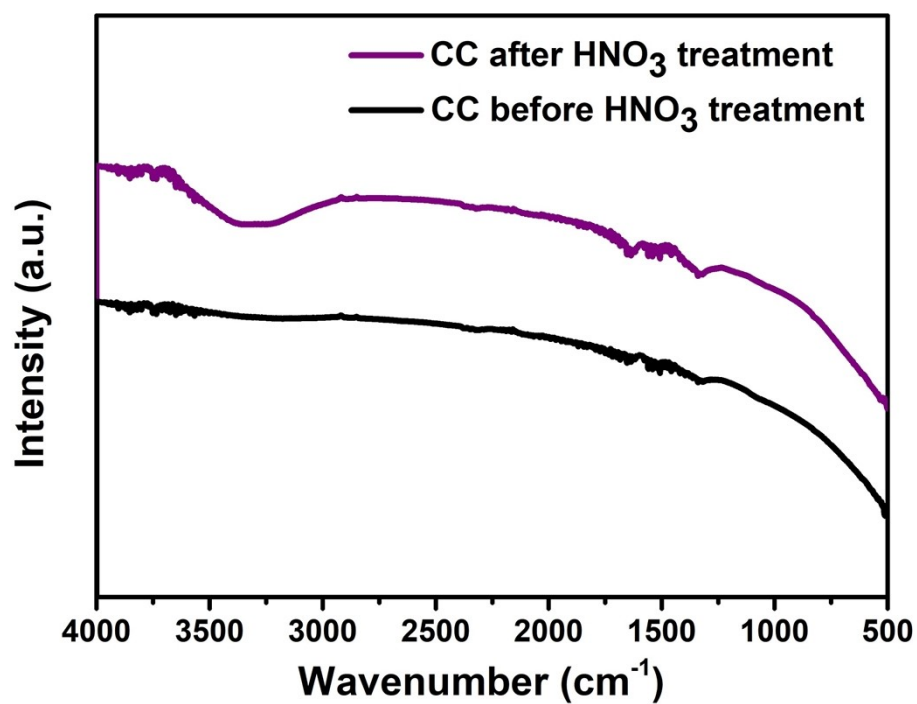

**Figure S1.** FTIR spectrogram of the CC before and after concentrated HNO<sub>3</sub> treatment.

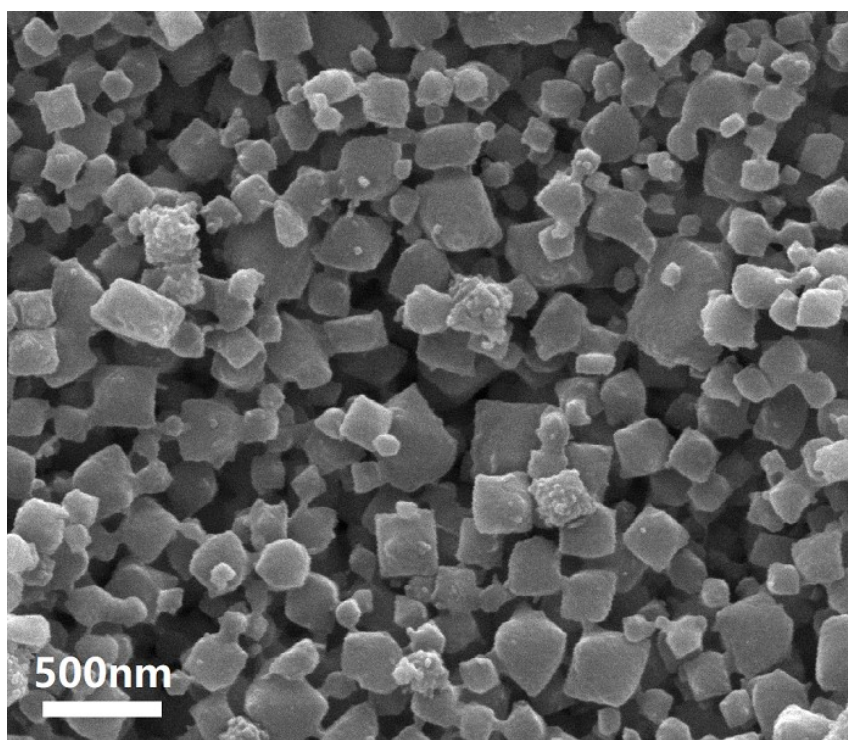

**Figure S2.** FESEM image of the NH<sub>2</sub>-MIL-101(Fe) precursor.

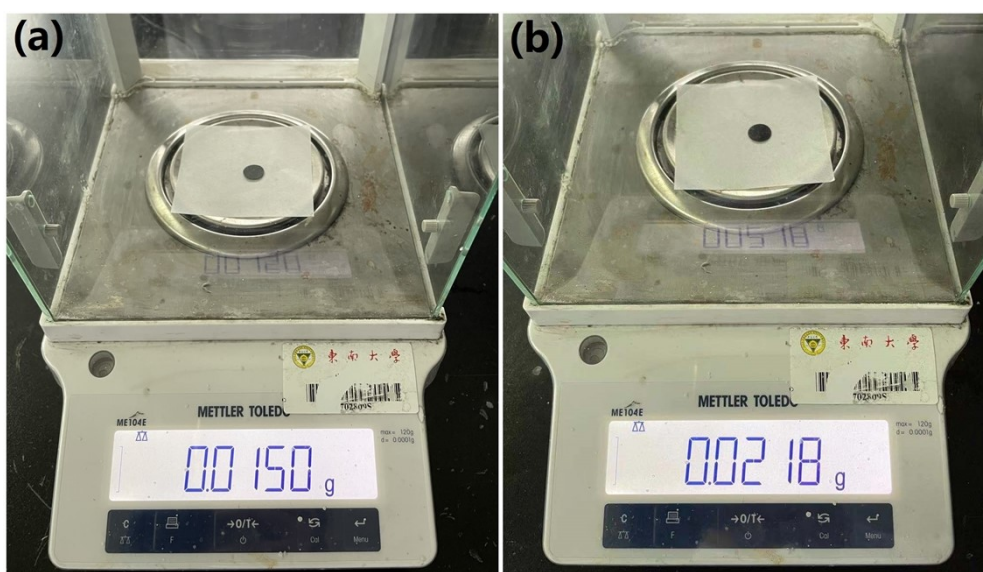

**Figure S3.** The mass of (a) CC and (b) FeP/NC@CC.

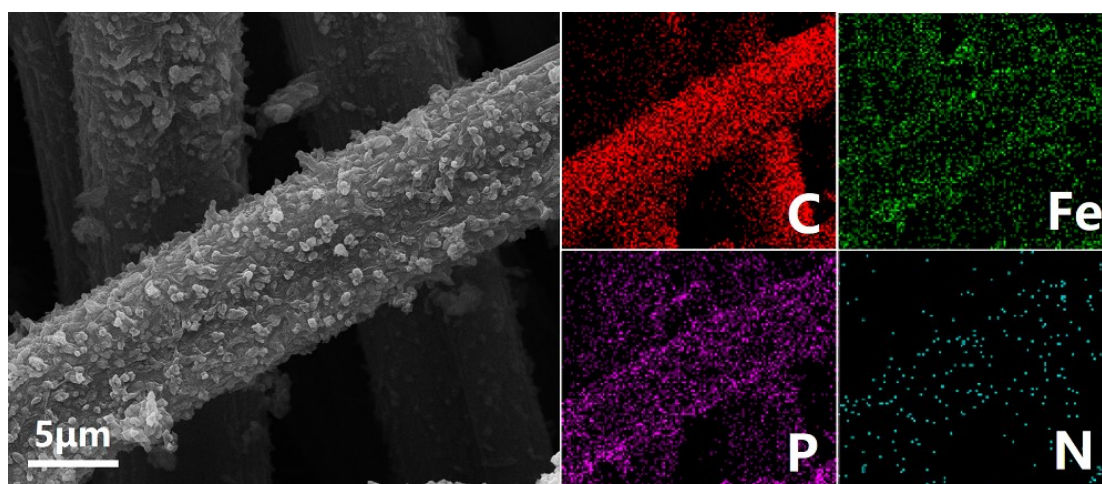

**Figure S4.** FESEM image and the corresponding EDX elemental mapping images of FeP/NC@CC.



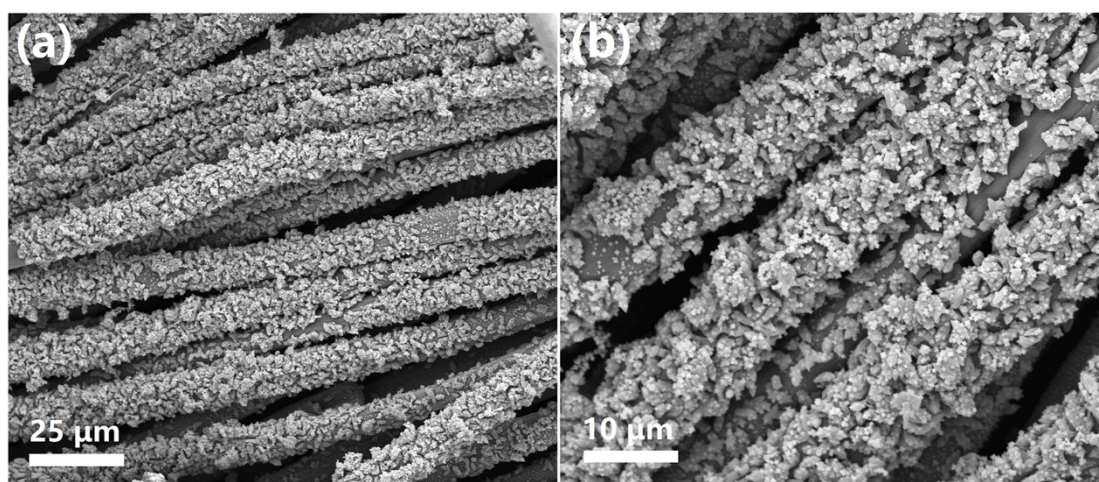

**Figure S5.** FESEM images of the FeP/NC@CC using CC without acid treatment.

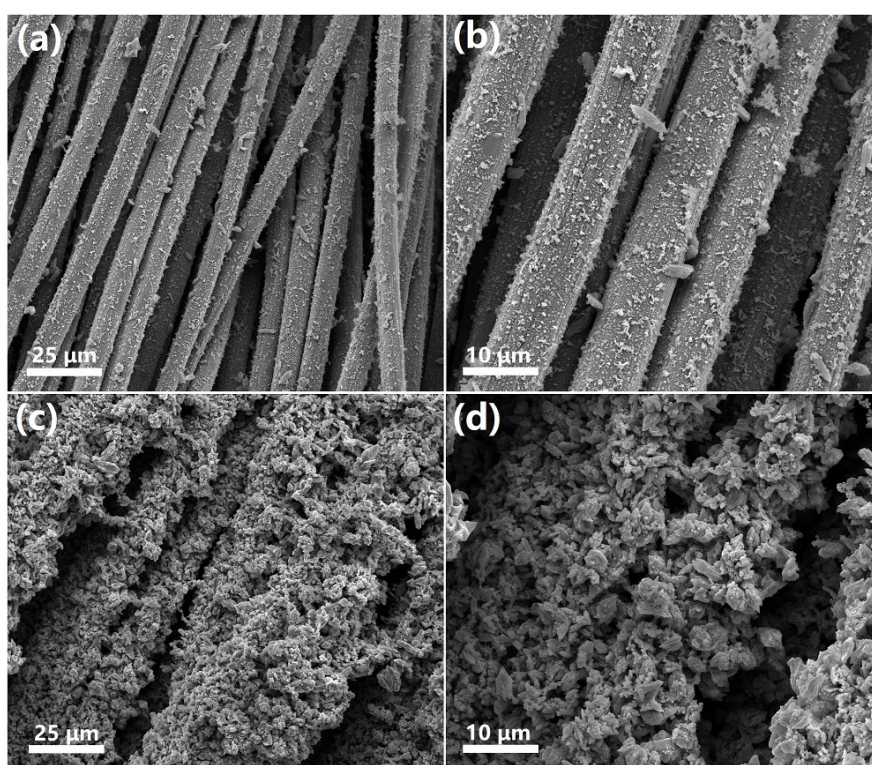

**Figure S6.** FESEM images of (a, b) FeP/NC@CC-1 and (c, d) FeP/NC@CC-2.

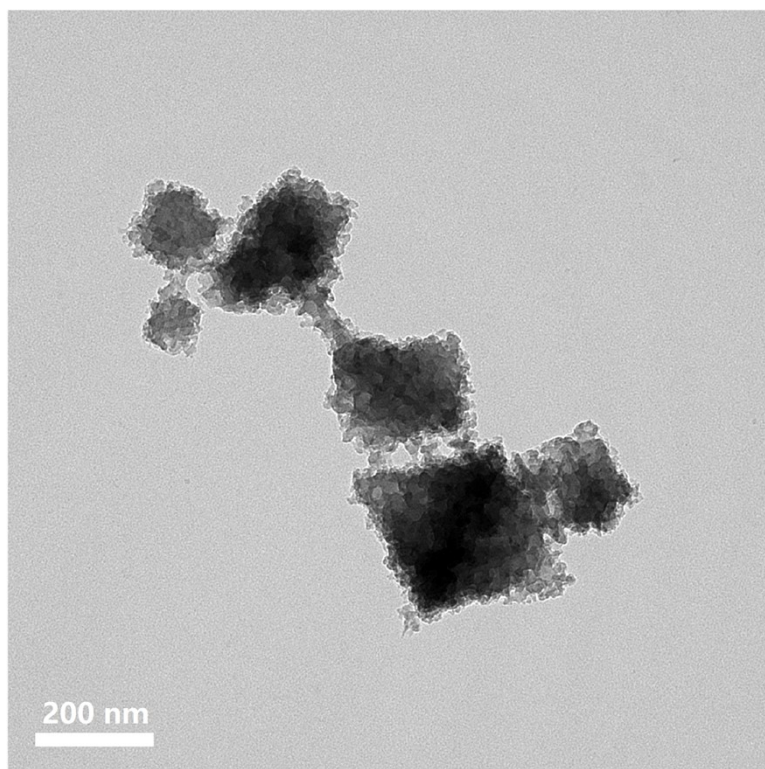

**Figure S7.** TEM image of the NH<sub>2</sub>-MIL-101(Fe) precursor.

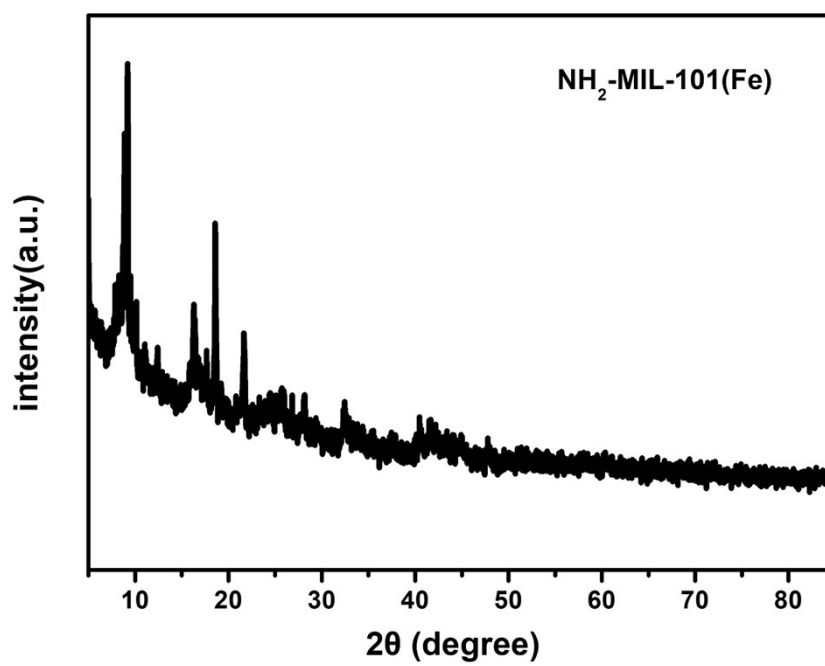

**Figure S8.** XRD pattern of the NH<sub>2</sub>-MIL-101(Fe).

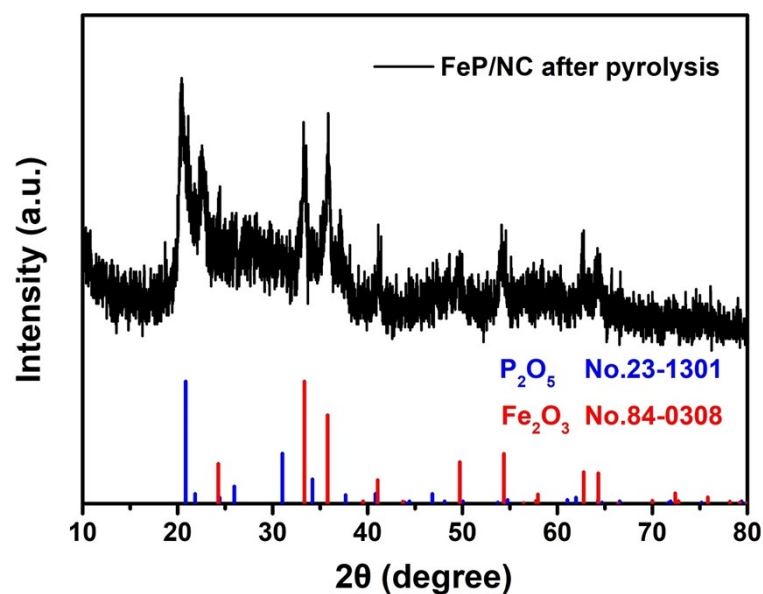

**Figure S9.** XRD pattern of the FeP/NC after calcination.

The XRD result indicates that the calcination products of FeP/NC are  $\text{Fe}_2\text{O}_3$  and  $\text{P}_2\text{O}_5$ , which is consistent with previous reports.<sup>1-3</sup> According to study, the mass of pure FeP will increase by 26% after calcination, while the mass loss of FeP/NC is caused by the consumption of NC.<sup>2,3</sup> Therefore, we set the total mass of FeP/NC as 1, and the mass of FeP as  $x$ . After calcination, the NC was removed, the products are  $\text{Fe}_2\text{O}_3$  and  $\text{P}_2\text{O}_5$  with a mass of  $1.26x$ . According to TGA result (**Figure 3c**), the mass of products is 1-32.2%, that is,  $1.26x = 1-32.2\%$ ,  $x = 0.538$ .

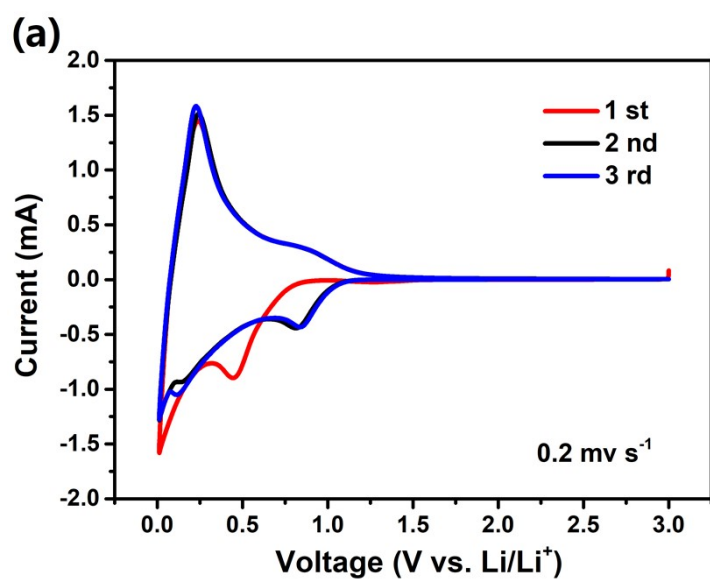

Figure S10. CV curves of pristine CC at the 0.2 mV s<sup>-1</sup>.

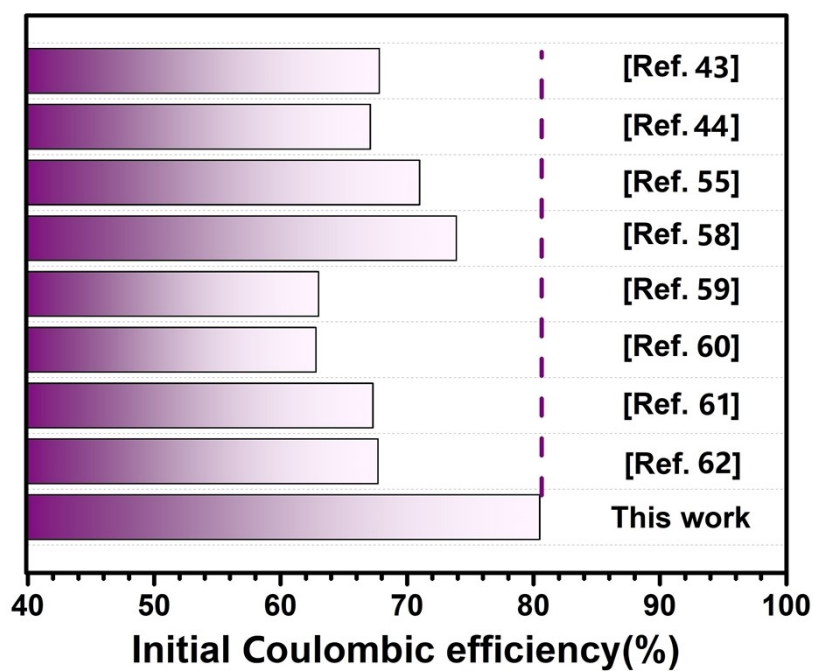

Figure S11. Comparison of the initial Coulombic efficiency of the FeP/NC@CC with those of other recently reported FeP-based electrodes.



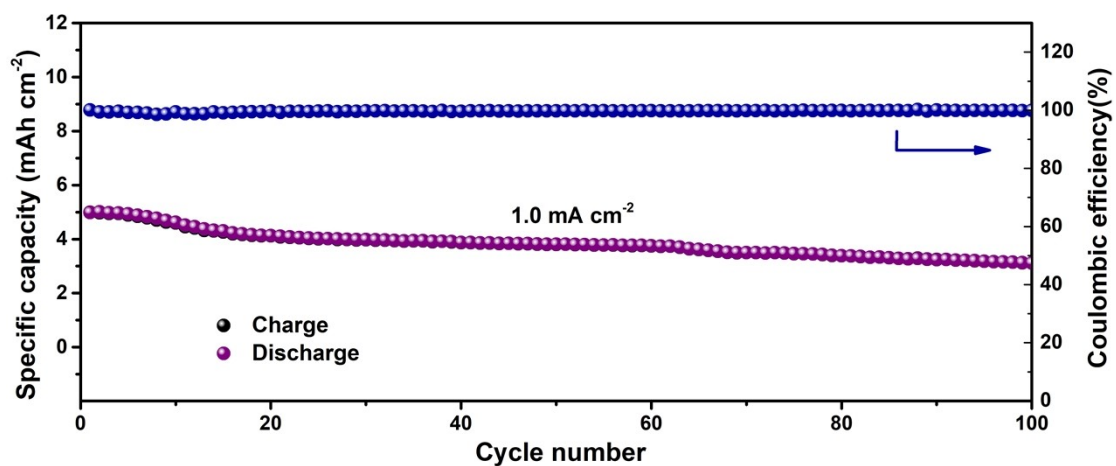

Figure S12. Cycling performance of FeP/NC@CC electrode at  $1.0 \text{ mA cm}^{-2}$ .

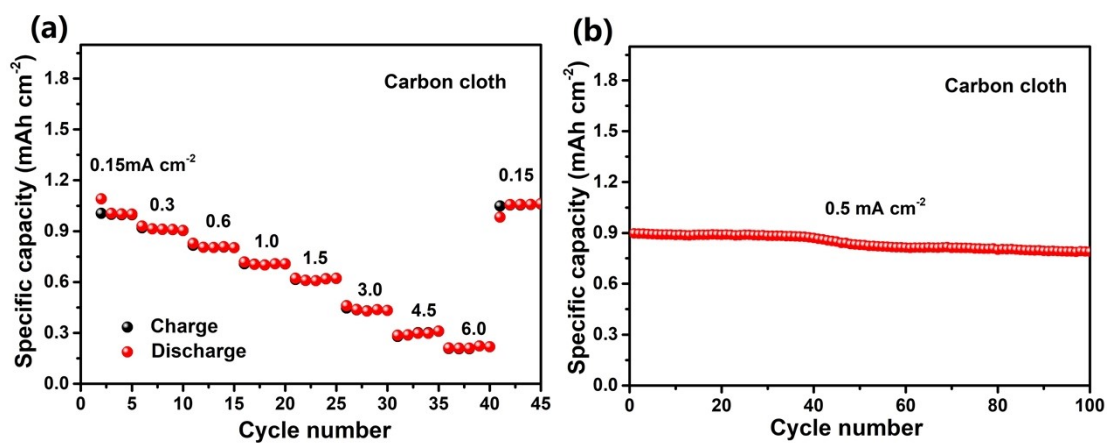

Figure S13. (a) The rate capability and (b) cycling performance of CC.



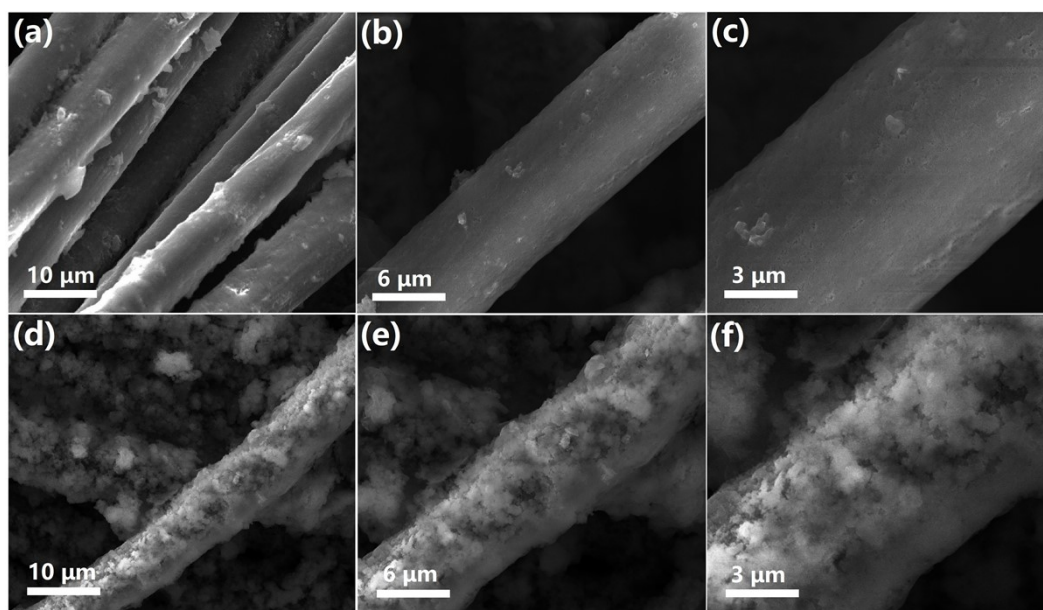

**Figure S14.** FESEM images of (a-c) FeP/NC@CC electrode and (d-f) FeP/NC@CC electrode using CC without acid treatment after 100 cycles.

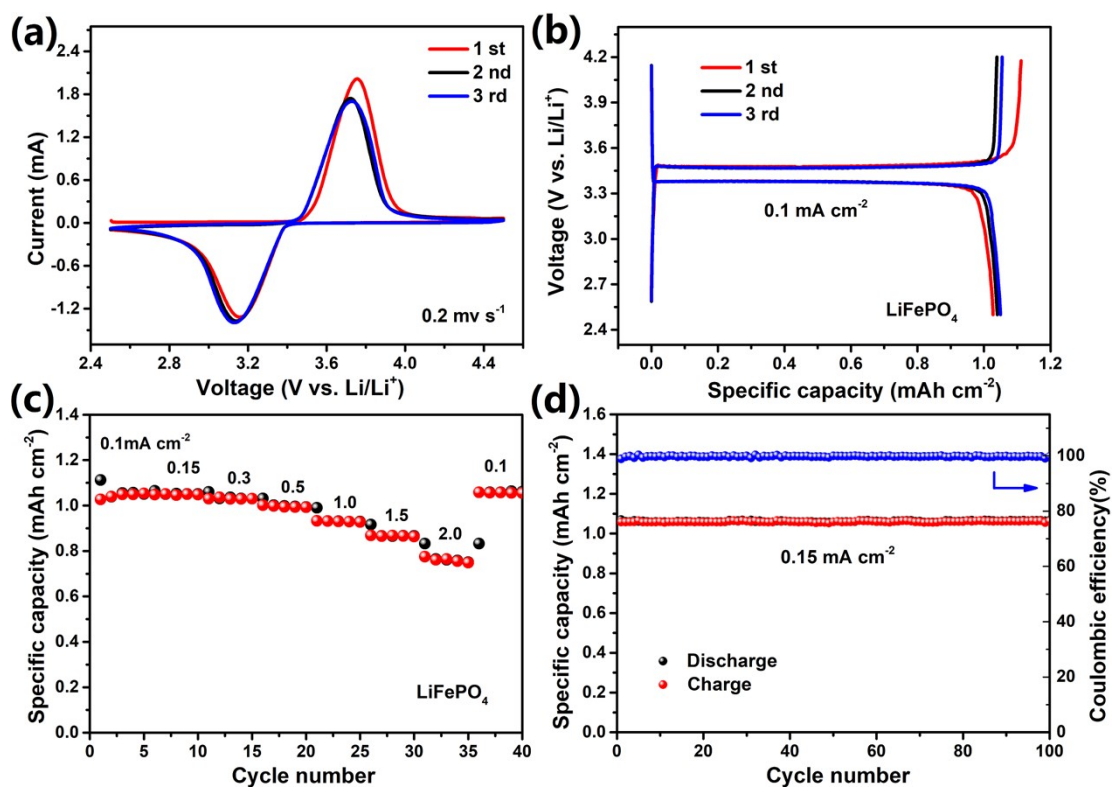

**Figure S15.** Electrochemical performance of the  $\text{LiFePO}_4$  electrode. (a) CV curves at  $0.2 \text{ mV s}^{-1}$ , (b) galvanostatic charge/discharge curves at  $0.1 \text{ mA cm}^{-2}$ , (c) rate capability at different rates, (d) cycle performance at  $0.15 \text{ mA cm}^{-2}$ .

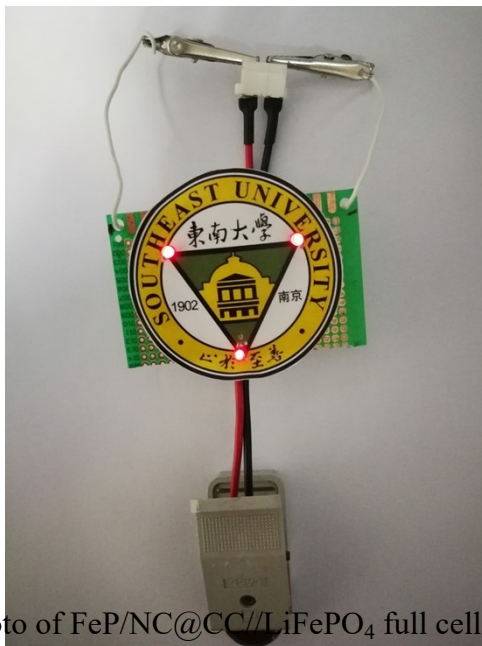

**Figure S16.** Digital photo of FeP/NC@CC//LiFePO<sub>4</sub> full cells to light red LEDs.

## References:

- 1 B. Hou, Y. Wang, Q. Ning, C. Fan, X. Xi, X. Yang, J. Wang, J. Zhang, X. Wang, X. Wu, *Nanoscale*, 2019, **11**, 1304-1312.
- 2 X. Wang, K. Chen, G. Wang, X. Liu, H. Wang, *Acs Nano*, 2017, **11**, 11602-11616.
- 3 P. Zhu, Z. Zhang, S. Hao, B. Zhang, P. Zhao, J. Yu, J. Cai, Y. Huang, Z. Yang, *Carbon*, 2018, **139**, 477-485.
